# Supplementary material for: Paroxetine suppresses reactive microglia-mediated but not lipopolysaccharide-induced inflammatory responses in primary astrocytes
Source: PubMed Central journal article supplement (PMC7003432; doi:10.1186/s12974-020-1712-0), 2020-02-05
Supplement: 12974_2020_1712_MOESM1_ESM.pdf [file 12974_2020_1712_MOESM1_ESM.pdf]

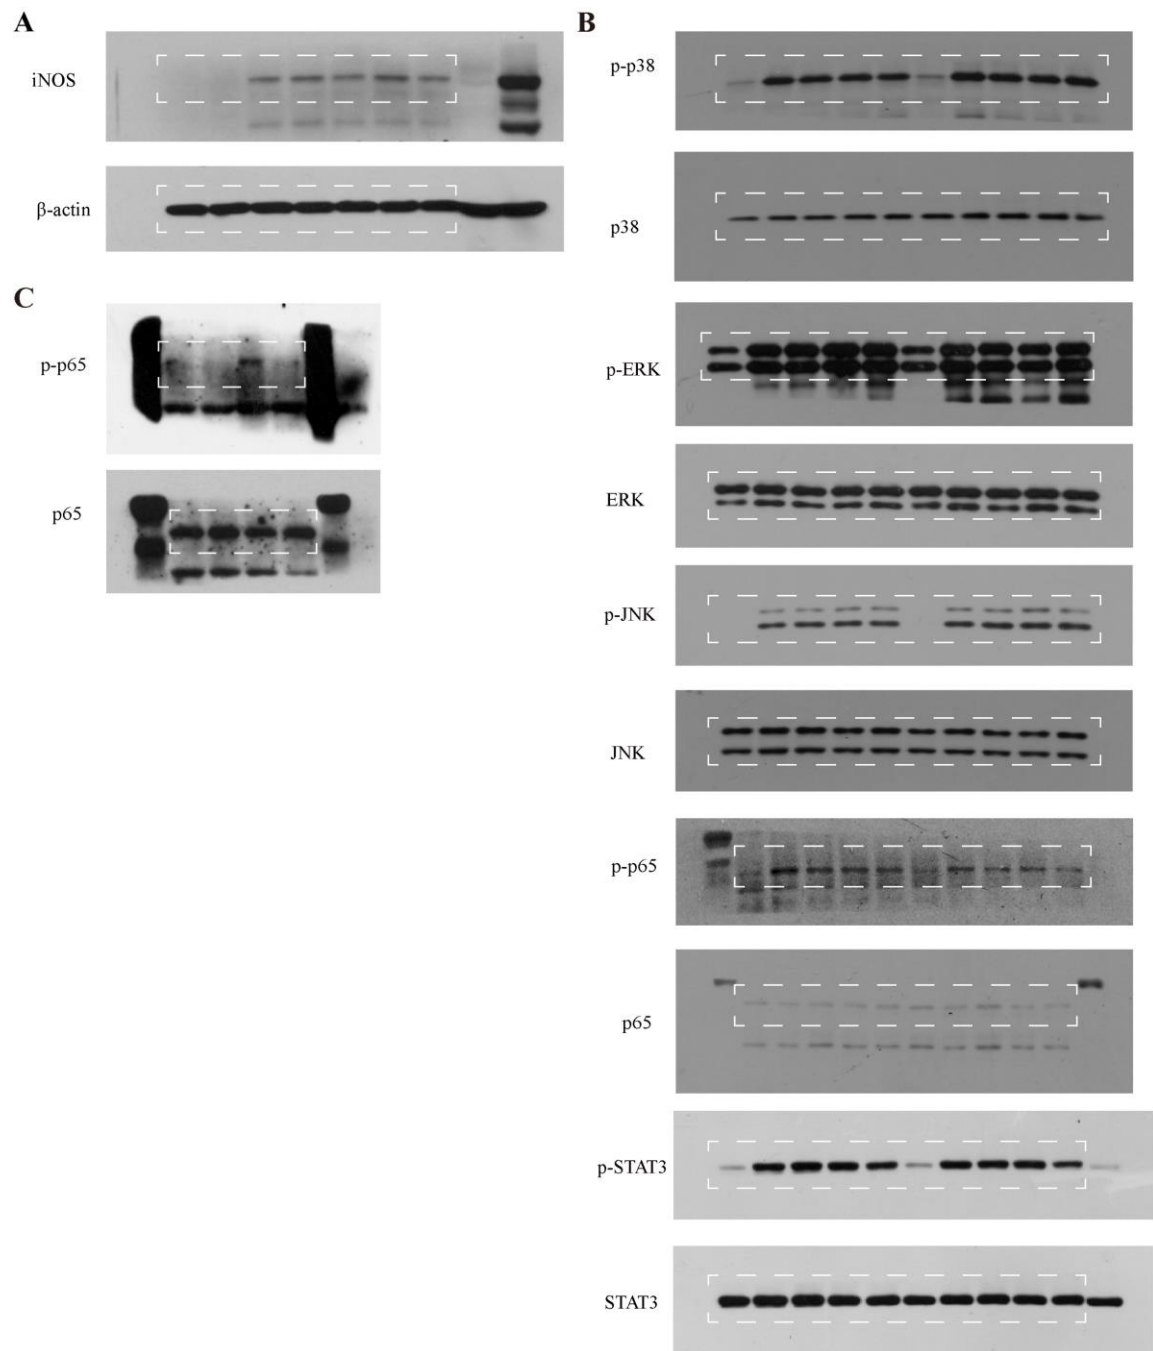

**Figure S1.** Full blots for the figures 3A (A), 6A (B) and 7A (C).
